# Supplementary material for: Thiophene-substituted aza-bodipy as a strategic synthon for the design of near-infrared dyes
Source: Royal Society of Chemistry journal article supplement (doi:10.1039/c2nj20943h), 2012-01-01
Supplement: c2nj20943h.pdf [file c2nj20943h.pdf]

*Supporting Information for*

# Thiophene-Substituted Aza-Bodipy as Strategic Synthons for the Design of Near- Infrared Dyes.

*Quentin Bellier, Fabrice Dalier, Erwann Jeanneau, Olivier Maury\* and Chantal Andraud\**

## X-ray Diffraction for Compound 3

### Crystal data

|                                |                                                        |
|--------------------------------|--------------------------------------------------------|
| $C_{28}H_{16}BBr_2F_2N_3S_2$   | $F(000) = 2640$                                        |
| $M_r = 667.19$                 | $D_x = 1.773 \text{ Mg m}^{-3}$                        |
| Monoclinic, $P2_1/c$           | Cu $K\alpha$ radiation, $\lambda = 1.5418 \text{ \AA}$ |
| Hall symbol: -P 2ybc           | Cell parameters from 13101 reflections                 |
| $a = 14.606 (1) \text{ \AA}$   | $\theta = 3.6\text{--}67.4^\circ$                      |
| $b = 14.212 (1) \text{ \AA}$   | $\mu = 6.02 \text{ mm}^{-1}$                           |
| $c = 25.060 (2) \text{ \AA}$   | $T = 110 \text{ K}$                                    |
| $\beta = 106.091 (7)^\circ$    | Plate, dark red                                        |
| $V = 4998.2 (7) \text{ \AA}^3$ | $0.36 \times 0.17 \times 0.08 \text{ mm}$              |
| $Z = 8$                        |                                                        |

Data collection

|                                                                                                                                                                                                                                                                                                                                                                                |                                                                        |
|--------------------------------------------------------------------------------------------------------------------------------------------------------------------------------------------------------------------------------------------------------------------------------------------------------------------------------------------------------------------------------|------------------------------------------------------------------------|
| Xcalibur, Atlas, Gemini ultra diffractometer                                                                                                                                                                                                                                                                                                                                   | 8863 independent reflections                                           |
| Radiation source: Enhance Ultra (Cu) X-ray Source                                                                                                                                                                                                                                                                                                                              | 8407 reflections with $I > 2.0\sigma(I)$                               |
| mirror                                                                                                                                                                                                                                                                                                                                                                         | $R_{\text{int}} = 0.073$                                               |
| Detector resolution: 10.4685 pixels $\text{mm}^{-1}$                                                                                                                                                                                                                                                                                                                           | $\theta_{\text{max}} = 67.5^\circ$ , $\theta_{\text{min}} = 3.6^\circ$ |
| $\omega$ scans                                                                                                                                                                                                                                                                                                                                                                 | $h = -17 \rightarrow 17$                                               |
| Absorption correction: analytical<br><i>CrysAlis PRO</i> , Agilent Technologies, Version 1.171.35.11 (release 16-05-2011 CrysAlis171.NET) (compiled May 16 2011,17:55:39)<br>Analytical numeric absorption correction using a multifaceted crystal model based on expressions derived by R.C. Clark & J.S. Reid. (Clark, R. C. & Reid, J. S. (1995). Acta Cryst. A51, 887-897) | $k = -16 \rightarrow 16$                                               |
| $T_{\text{min}} = 0.159$ , $T_{\text{max}} = 0.457$                                                                                                                                                                                                                                                                                                                            | $l = -29 \rightarrow 29$                                               |
| 54285 measured reflections                                                                                                                                                                                                                                                                                                                                                     |                                                                        |

Refinement

|                                 |                                                                                                                                                                                                                                                                                                                                                                                 |
|---------------------------------|---------------------------------------------------------------------------------------------------------------------------------------------------------------------------------------------------------------------------------------------------------------------------------------------------------------------------------------------------------------------------------|
| Refinement on $F^2$             | Primary atom site location: structure-invariant direct methods                                                                                                                                                                                                                                                                                                                  |
| Least-squares matrix: full      | Hydrogen site location: inferred from neighbouring sites                                                                                                                                                                                                                                                                                                                        |
| $R[F^2 > 2\sigma(F^2)] = 0.040$ | Method, part 1, Chebychev polynomial, (Watkin, 1994, Prince, 1982) [weight] = $1.0/[A_0*T_0(x) + A_1*T_1(x) \dots + A_{n-1}]*T_{n-1}(x)]$ where $A_i$ are the Chebychev coefficients listed below and $x = F/F_{\text{max}}$ Method = Robust Weighting (Prince, 1982) $W = [\text{weight}] * [1 - (\Delta F/6*\sigma F)^2]^2$ $A_i$ are: 0.142E+04 0.241E+04 0.150E+04 626.139. |
| $wR(F^2) = 0.113$               | $(\Delta/\sigma)_{\text{max}} = 0.002$                                                                                                                                                                                                                                                                                                                                          |
| $S = 1.01$                      | $\Delta_{\text{max}} = 0.66 \text{ e } \text{\AA}^{-3}$                                                                                                                                                                                                                                                                                                                         |
| 8863 reflections                | $\Delta_{\text{min}} = -0.71 \text{ e } \text{\AA}^{-3}$                                                                                                                                                                                                                                                                                                                        |
| 686 parameters                  | Extinction correction: Larson (1970), Equation 22                                                                                                                                                                                                                                                                                                                               |
| 0 restraints                    | Extinction coefficient: 48 (3)                                                                                                                                                                                                                                                                                                                                                  |
